# Supplementary material
Source: PubMed Central journal article supplement (PMC6222098)
Supplement: supp_RA118.004854_139393_2_supp_201122_p1y0yy.pdf [file supp_RA118.004854_139393_2_supp_201122_p1y0yy.pdf]

## Supporting Information

### *Helicobacter pylori* binding non-acid glycosphingolipids in the human stomach

Chunsheng Jin, Angela Barone, Thomas Borén, and Susann Teneberg

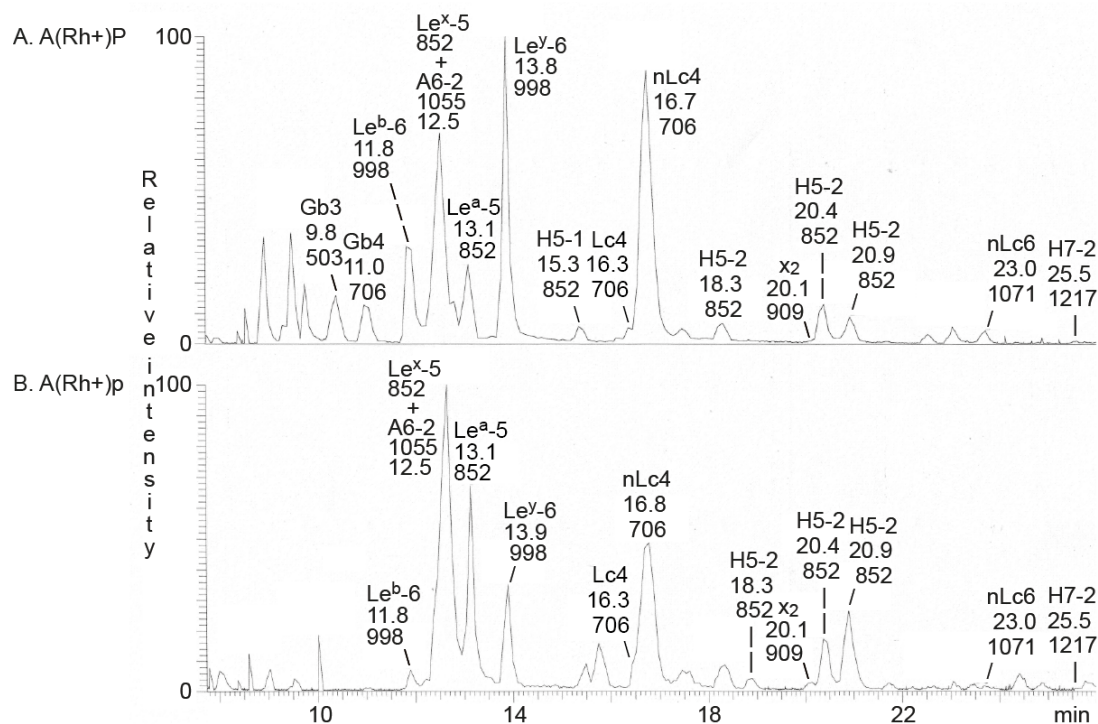

**Figure S1. LC-ESI/MS of the oligosaccharides obtained from the total non-acid glycosphingolipid fraction from human blood group A(Rh+)P and A(Rh+)p stomachs by hydrolysis with endoglycoceramidase II from *Rhodococcus* spp.**

(A) Base peak chromatogram from LC-ESI/MS of the oligosaccharides obtained from human stomach blood group A(Rh+)P.

(B) Base peak chromatogram from LC-ESI/MS of the oligosaccharides obtained from human stomach blood group A(Rh+)p.

The identification of oligosaccharides was based on their retention times, determined molecular masses and subsequent MS<sup>2</sup> sequencing. The oligosaccharides identified in the chromatograms were: Gb3, Gal $\alpha$ 4Gal $\beta$ 4Glc; Gb4, GalNAc $\beta$ 3Gal $\alpha$ 4Gal $\beta$ 4Glc; Le<sup>b</sup>-6, Fuca $\alpha$ 2Gal $\beta$ 3(Fuca $\alpha$ 4)GlcNAc $\beta$ 3Gal $\beta$ 4Glc; Le<sup>x</sup>-5, Gal $\beta$ 4(Fuca $\alpha$ 3)GlcNAc $\beta$ 3Gal $\beta$ 4Glc; A6-2, GalNAc $\alpha$ 3(Fuca $\alpha$ 2)Gal $\beta$ 4(Fuca $\alpha$ 3)GlcNAc $\beta$ 3Gal $\beta$ 4Glc; Le<sup>a</sup>-5, Gal $\beta$ 3(Fuca $\alpha$ 4)GlcNAc $\beta$ 3Gal $\beta$ 4Glc; Le<sup>y</sup>-6, Fuca $\alpha$ 2Gal $\beta$ 4(Fuca $\alpha$ 3)GlcNAc $\beta$ 3Gal $\beta$ 4Glc; nLc4, Gal $\beta$ 4GlcNAc $\beta$ 3Gal $\beta$ 4Glc; H5-1, Fuca $\alpha$ 2Gal $\beta$ 3GlcNAc $\beta$ 3Gal $\beta$ 4Glc; Lc4, Gal $\beta$ 3GlcNAc $\beta$ 3Gal $\beta$ 4Glc; nLc4, Gal $\beta$ 4GlcNAc $\beta$ 3Gal $\beta$ 4Glc; H5-2, Fuca $\alpha$ 2Gal $\beta$ 4GlcNAc $\beta$ 3Gal $\beta$ 4Glc; x<sub>2</sub>, GalNAc $\beta$ 3Gal $\beta$ 4GlcNAc $\beta$ 3Gal $\beta$ 4Glc; nLc6, Gal $\beta$ 4GlcNAc $\beta$ 3Gal $\beta$ 4GlcNAc $\beta$ 3Gal $\beta$ 4Glc; H7-2, Fuca $\alpha$ 2Gal $\beta$ 4GlcNAc $\beta$ 3Gal $\beta$ 4GlcNAc $\beta$ 3Gal $\beta$ 4Glc.

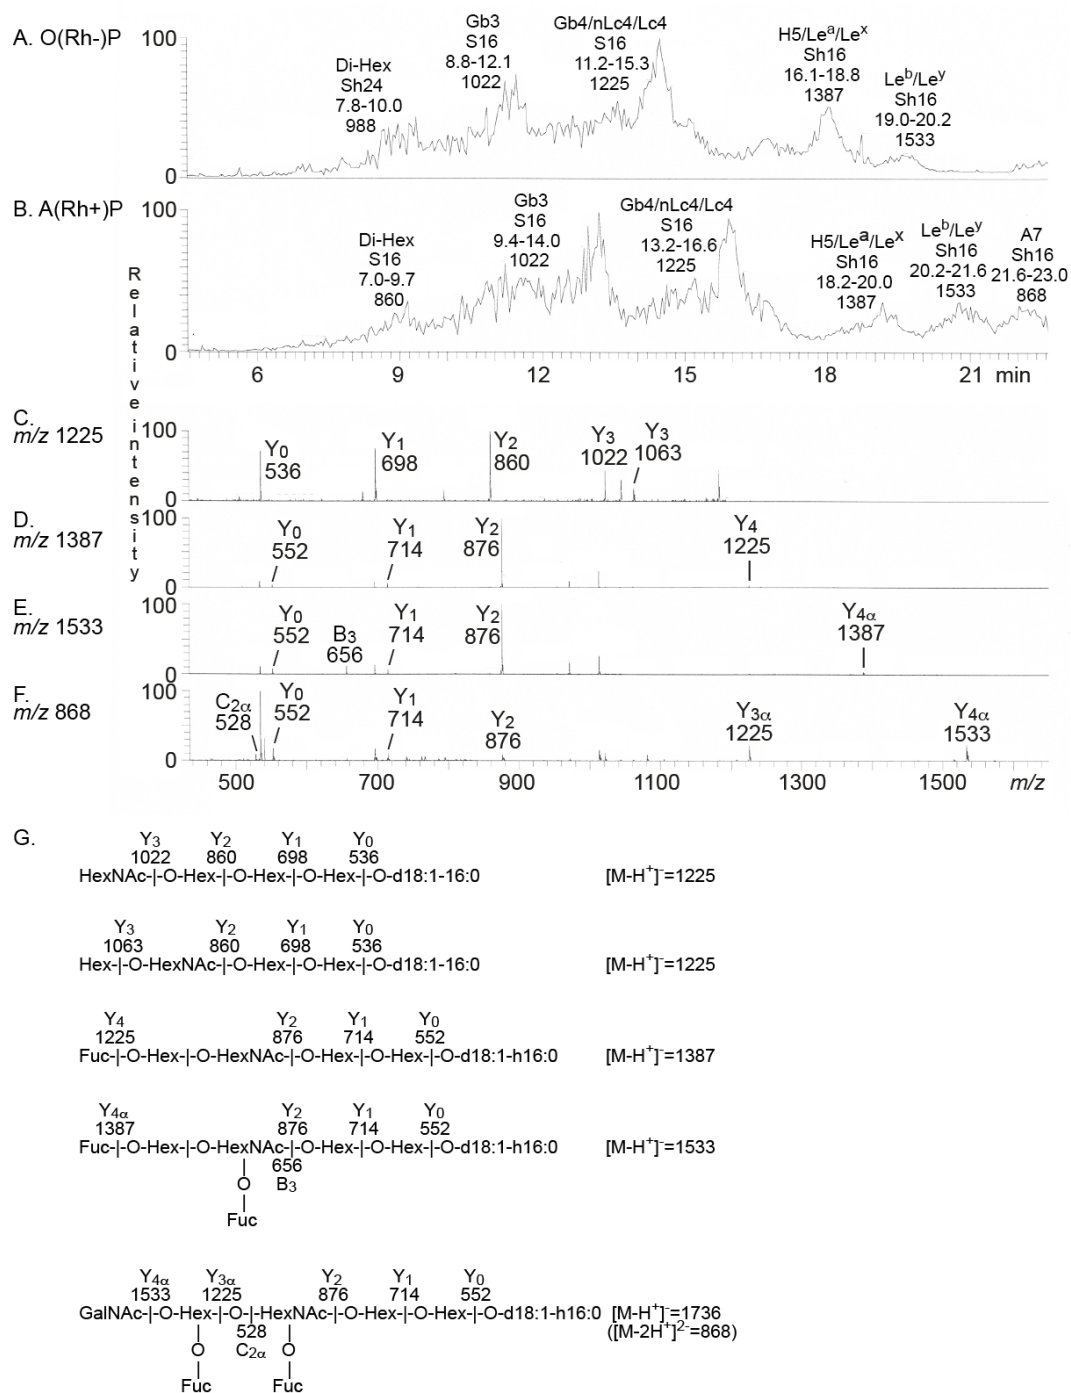

**Figure S2. LC-ESI/MS of the native total non-acid glycosphingolipids of human stomach.**

(A) Base peak chromatogram from LC-ESI/MS of the non-acid glycosphingolipids from human stomach blood group O(Rh-)P.

(B) Base peak chromatogram from LC-ESI/MS of the non-acid glycosphingolipids from human stomach blood group A(Rh+)P.

(C) MS<sup>2</sup> of the ion at  $m/z$  1225 from LC-ESI/MS of the non-acid glycosphingolipids from human stomach blood group A(Rh+)P (retention time 16.4 min).

(D) MS<sup>2</sup> of the ion at  $m/z$  1387 from LC-ESI/MS of the non-acid glycosphingolipids from human stomach blood group A(Rh+)P (retention time 19.2 min).

(E) MS<sup>2</sup> of the ion at  $m/z$  1533 from LC-ESI/MS of the non-acid glycosphingolipids from human stomach blood group A(Rh+)P (retention time 20.7 min).

(F) MS<sup>2</sup> of the ion at  $m/z$  868 from LC-ESI/MS of the non-acid glycosphingolipids from human stomach blood group A(Rh+)P (retention time 22.1 min).

The identification of glycosphingolipids was based on their retention times, determined molecular masses and subsequent MS<sup>2</sup> sequencing. See Table 2 for abbreviations of oligosaccharide structures. A7, GalNAc $\beta$ 3(Fuca $\alpha$ 2)Gal $\beta$ 3/4(Fuca $\alpha$ 3/4)GlcNAc $\beta$ 3Gal $\beta$ 4Glc $\beta$ 1Cer. In the nomenclature for ceramides S denotes sphingosine (d18:1, 1,3-dihydroxy-2-aminooctadecene). Fatty acids with a 2-hydroxy group are denoted by the prefix h before the abbreviation. Thus, S16 denotes sphingosine with non-hydroxy 16:0 fatty acid, and Sh16 denotes sphingosine with hydroxy 16:0 fatty acid.
